# Supplementary material for: Photoactive Yellow Protein Adsorption at Hydrated Polyethyleneimine and Poly-l-Glutamic Acid Interfaces
Source: MDPI journal article supplement (doi:10.3390/molecules28104077), 2023-05-13
Supplement: s1 [file s1]

# Photoactive yellow protein adsorption at hydrated polyethyleneimine and poly-L-glutamic acid interfaces

Szilvia Krekic<sup>1,2,3</sup>, Mark Mero<sup>4</sup>, Michel Kuhl<sup>1,5</sup>, Kannan Balasubramanian<sup>1,5</sup>, András Dér<sup>2</sup>, and Zsuzsanna Heiner<sup>1\*</sup>

<sup>1</sup> School of Analytical Sciences Adlershof, Humboldt-Universität zu Berlin, Berlin, Germany

<sup>2</sup> Institute of Biophysics, Biological Research Centre, Szeged, Hungary

<sup>3</sup> Doctoral School of Multidisciplinary Medical Sciences, University of Szeged, Szeged, Hungary

<sup>4</sup> Max Born Institute for Nonlinear Optics and Short Pulse Spectroscopy, Berlin, Germany

<sup>5</sup> Department of Chemistry and IRIS Adlershof, Humboldt-Universität zu Berlin, Berlin, Germany

\*Correspondence: heinerzs@hu-berlin.de

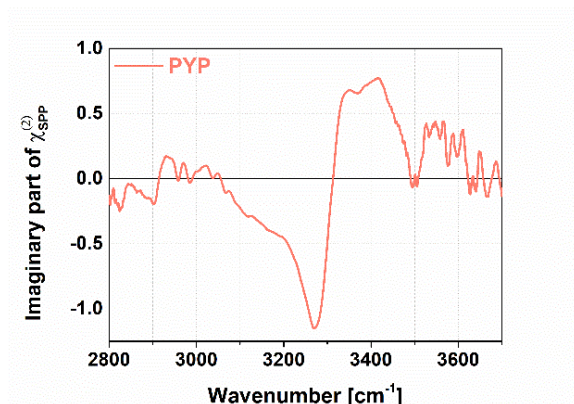

**Figure S1.** Imaginary part of the chiral VSFG spectra of PYP in the C-H, N-H, and O-H stretch region calculated from the observed SPP spectrum via the MEM algorithm.

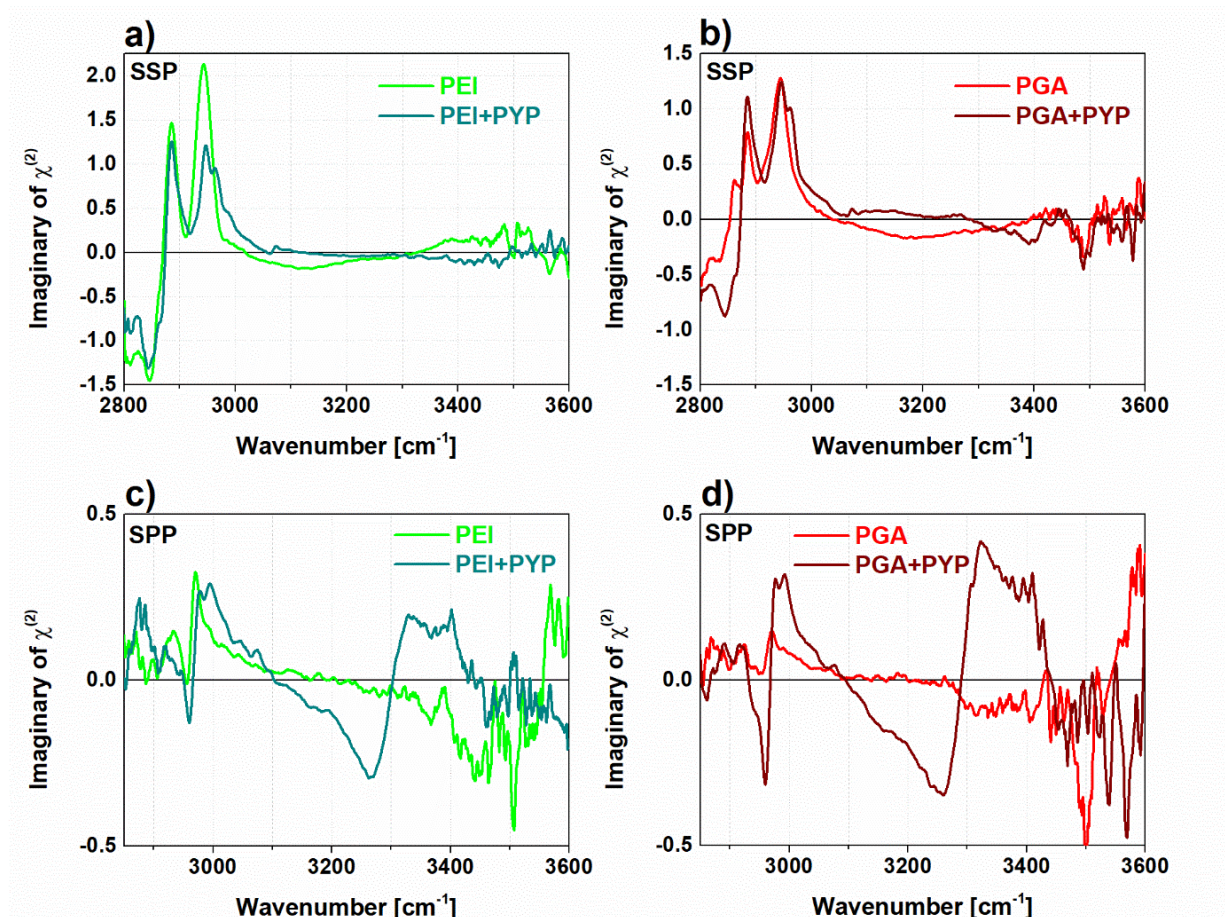

Figure S2. Calculated imaginary part of  $\chi^{(2)}$  of PEI and PEI+PYP (a, c), and PGA and PGA+PYP (b, d) in SSP and SPP polarizations, respectively.

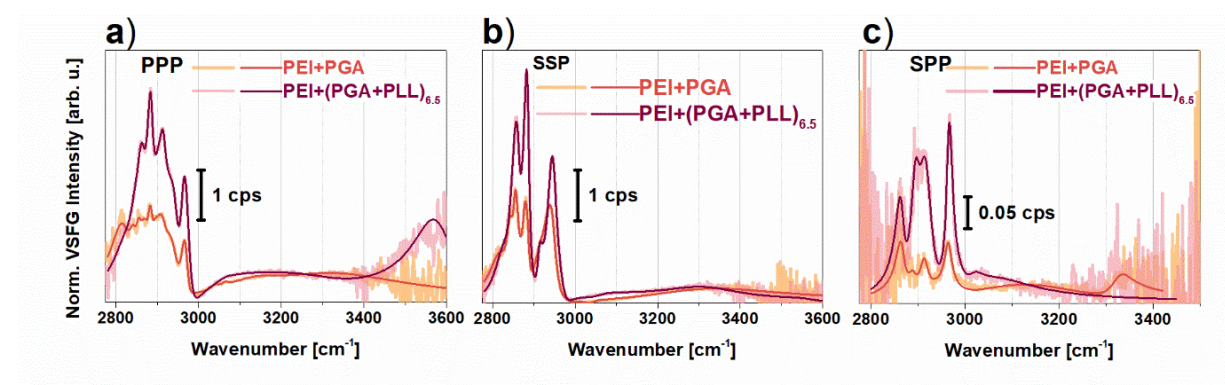

Figure S3. Achiral (a, b) and chiral (c) VSFG spectra of one pair of PEI+PGA and PEI+(PGA+PLL)<sub>6.5</sub> multilayers in the C-H, N-H, and O-H stretch region. The topmost layer contains PGA in each case.

**Table S1.** Vibrational mode assignments and corresponding VSFG wavenumbers, spectral widths, and amplitudes of PEI+(PGA+PLL)<sub>6.5</sub>, i.e., topmost layer is PGA, in the spectral region between 1400 and 1700 cm<sup>-1</sup> at a relative humidity of 80%.

| Band assignments, achiral (SSP)                                      | $\omega$ [ cm <sup>-1</sup> ] | $\Gamma$ | Q    |
|----------------------------------------------------------------------|-------------------------------|----------|------|
| $\nu_s \text{ COO}^-$                                                | 1408                          | 8        | 16   |
| $\delta \text{ CH}_2 / \nu \text{ C-N}$                              | 1430                          | 5        | 3.9  |
| $\delta \text{ CH}_2$                                                | 1463                          | 13.6     | 53.2 |
| $\delta \text{ CH}_2$                                                | 1475                          | 17.4     | 65.7 |
| $\delta \text{ CH}$                                                  | 1499                          | 19.8     | 29   |
| $\delta_s \text{ NH}_3^+$ (from Lys layer, or end terminal)          | 1523                          | 16       | 11   |
| $\nu_{AS} \text{ COO}^-$                                             | 1550                          | 14       | 2    |
| $\delta \text{ NH}_2$                                                | 1597                          | 15       | -3.7 |
| $\nu \text{ C=O}$ and contribution from $\delta_{AS} \text{ NH}_3^+$ | 1646                          | 28       | 6.9  |

**Table S2.** Vibrational mode assignments and corresponding VSFG wavenumbers, spectral widths, and amplitudes of PEI+(PGA+PLL)<sub>6.5</sub>+PYP, i.e., topmost layer is PYP, in the spectral region between 1400 and 1700 cm<sup>-1</sup> at a relative humidity of 80%.

| Band assignments, achiral (SSP)                       | $\omega$ [ cm <sup>-1</sup> ] | $\Gamma$ | Q    |
|-------------------------------------------------------|-------------------------------|----------|------|
| $\nu_s \text{ COO}^-$                                 | 1400                          | 8        | 33   |
| $\delta \text{ CH}_2$                                 | 1430                          | 20       | 17.8 |
| $\delta \text{ CH, CH}_2, \text{ and CH}_3$           | 1455                          | 8        | 1    |
| $\delta_{AS} \text{ CH}_3$                            | 1470                          | 19       | 40.7 |
| $\nu \text{ C-C} / \delta \text{ CH}$ (Tyr, Trp, Phe) | 1497                          | 26       | 60   |
| $\nu \text{ C-C}$ (Tyr-OH)                            | 1516                          | 13       | 11.4 |
| $\delta_s \text{ NH}_3^+$ (Lys)                       | 1531                          | 16       | 11   |
| Amide II / $\nu_{AS} \text{ COO}^-$ (Glu, Asp)        | 1548                          | 14       | 26.1 |
| Amide II / $\nu_{AS} \text{ COO}^-$ (Glu, Asp)        | 1564                          | 8.5      | 5.8  |
| $\nu_{AS} \text{ COO}^- *$                            | 1578                          | 21       | 24.5 |
| Amide I                                               | 1640                          | 20       | 1    |
| Amide I                                               | 1665                          | 25       | 13.1 |

**Table S3.** Chiral vibrational mode assignments and corresponding VSFG wavenumbers, spectral widths, and amplitudes of PEI+(PGA+PLL)<sub>6.5</sub>, i.e., topmost layer is PGA, in the spectral region between 1500 and 1700 cm<sup>-1</sup> at a relative humidity of 80%.

| Band assignments, chiral (SPP)                | $\omega$ [ cm <sup>-1</sup> ] | $\Gamma$ | Q   |
|-----------------------------------------------|-------------------------------|----------|-----|
| $\delta_s$ NH <sub>3</sub> <sup>+</sup> (Lys) | 1521                          | 14.6     | 1   |
| $\nu_{AS}$ COO <sup>-</sup> *                 | 1554                          | 20       | 4.1 |
| $\nu_{AS}$ COO <sup>-</sup> *                 | 1583                          | 20       | 7.1 |
| -COOH / $\delta$ NH <sub>2</sub>              | 1609                          | 14.4     | 4.8 |
| $\nu$ C=O                                     | 1668                          | 13.9     | 4.1 |

\* Since the stretching frequency of COO<sup>-</sup> group very sensitive to the environment, may shift +/- 40 cm<sup>-1</sup>

**Table S4.** Chiral vibrational mode assignments and corresponding VSFG wavenumbers, spectral widths, and amplitudes of PEI+(PGA+PLL)<sub>6.5</sub>+PYP in a relative humidity of 80% in the spectral region between 1500 and 1700 cm<sup>-1</sup>.

| Band assignments at RH 80%, chiral (SPP)                           | $\omega$ [ cm <sup>-1</sup> ] | $\Gamma$ | Q    |
|--------------------------------------------------------------------|-------------------------------|----------|------|
| $\nu$ C-C (Tyr, Trp, Phe)                                          | 1516                          | 14.5     | -3.6 |
| Amide II / $\nu_{AS}$ COO <sup>-</sup> (Glu, Asp)                  | 1554                          | 19.1     | -4.2 |
| $\nu_{AS}$ COO <sup>-</sup> (Glu, Asp)                             | 1588                          | 21.6     | -3.3 |
| -COOH / $\delta$ NH <sub>2</sub> (Gln, Asn) / $\nu$ C-C (Tyr, Trp) | 1612                          | 15.8     | -9.3 |
| Amide I B2 mode for $\beta$ -sheet                                 | 1626                          | 10.7     | 17.5 |
| Amide I B1 mode for $\beta$ -sheet, $\nu$ C=O (Glu, Asp)           | 1682                          | 7.7      | 5.7  |

**Table S5.** Vibrational mode assignments and corresponding VSFG wavenumbers, spectral widths, and amplitudes of PEI+(PGA+PLL)<sub>6.5</sub>+PYP in a relative humidity (RH) of 3% in the spectral region between 1500 and 1700 cm<sup>-1</sup>.

| Band assignments at RH 3%, chiral (SPP)                            | $\omega$ [ cm <sup>-1</sup> ] | $\Gamma$ | Q     |
|--------------------------------------------------------------------|-------------------------------|----------|-------|
| $\nu$ C-C (Tyr, Trp, Phe)                                          | 1510                          | 30       | -2    |
| $\delta_s$ NH <sub>3</sub> <sup>+</sup> (Lys)                      | 1533                          | 9.4      | -2.2  |
| Amide II / $\nu_{AS}$ COO <sup>-</sup> (Glu, Asp)                  | 1564                          | 12.7     | -3.9  |
| $\nu_{AS}$ COO <sup>-</sup> (Glu, Asp)                             | 1590                          | 24.5     | -9    |
| -COOH / $\delta$ NH <sub>2</sub> (Gln, Asn) / $\nu$ C-C (Tyr, Trp) | 1610                          | 25       | -60.1 |
| Amide I B2 mode for $\beta$ -sheet                                 | 1640                          | 10.3     | 9     |
| Amide I for $\alpha$ -helix                                        | 1654                          | 24.7     | 52.7  |
| Amide I B1 mode for $\beta$ -sheet, $\nu$ C=O (Glu, Asp)           | 1688                          | 7.6      | 10    |



**Table S6.** Vibrational mode assignments and corresponding VSFG wavenumbers, spectral widths, and amplitudes of PEI+(PGA+PLL)<sub>6.5</sub>+PYP in a relative humidity (RH) of 100% in the spectral region between 1500 and 1700 cm<sup>-1</sup>.

| Band assignments at RH 100%, chiral (SPP)                                 | $\omega$ [ cm <sup>-1</sup> ] | $\Gamma$ | Q    |
|---------------------------------------------------------------------------|-------------------------------|----------|------|
| $\delta_s$ NH <sub>3</sub> <sup>+</sup> (Lys) / $\nu$ C-C (Tyr, Trp, Phe) | 1522                          | 16       | 2.8  |
| Amide II / $\nu_{AS}$ COO <sup>-</sup> (Glu, Asp)                         | 1545                          | 8        | -0.5 |
| $\nu_{AS}$ COO <sup>-</sup> (Glu, Asp)                                    | 1590                          | 13.9     | -0.8 |
| -COOH / $\delta$ NH <sub>2</sub> (Gln, Asn) / $\nu$ C-C (Tyr, Trp)        | 1605                          | 12.5     | -6.6 |
| Amide I B2 mode for $\beta$ -sheet                                        | 1621                          | 11.9     | 39.4 |
| Amide I B1 mode for $\beta$ -sheet, $\nu$ C=O (Glu, Asp)                  | 1685                          | 11.3     | 8.9  |

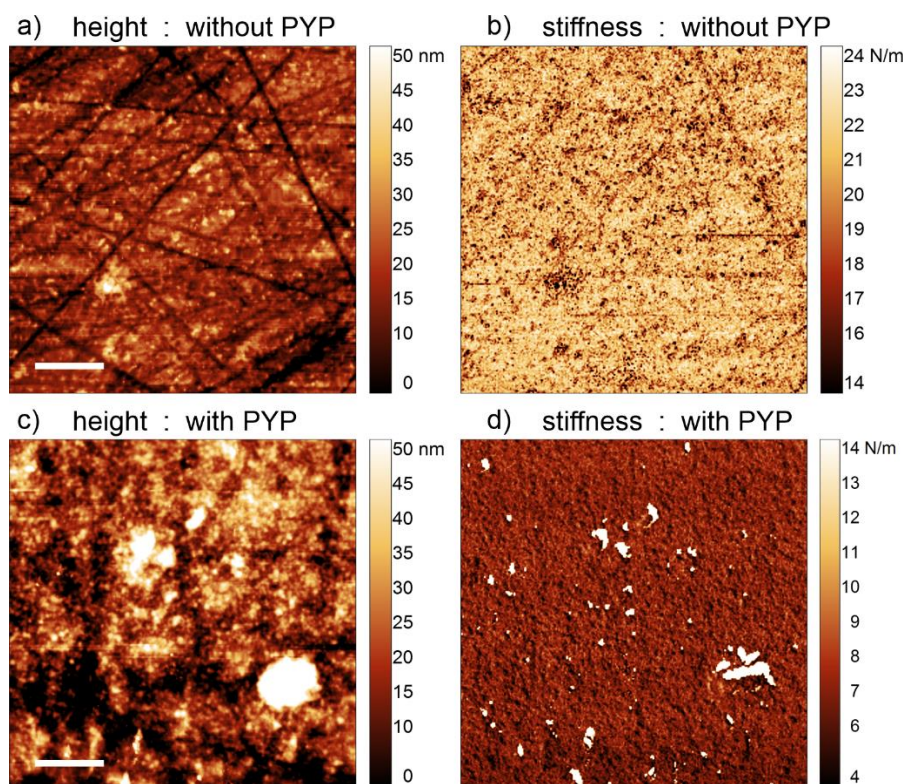

**Figure S4.** Surface characterization of (a,b) PEI+(PGA+PLL)<sub>6.5</sub> and (c,d) PEI+(PGA+PLL)<sub>6.5</sub>+PYP multilayers using Quantitative Imaging mode AFM. Before deposition of PYP, we observe a surface topography typical for CaF<sub>2</sub> substrates (a). After coating the surface with the protein, a coarse surface is observable (c). The crack-like lines seen in (a) are not observable anymore, suggesting that the surface is indeed covered by a molecular layer. After coverage the roughness appears to be slightly higher. However, the height range is in the same order as before protein adsorption. This suggests that the protein indeed forms a conformal layer on the PGA-terminated CaF<sub>2</sub> surface. The presence of the protein layer is further attested by the stiffness images (b,d), which plot the slope of the AFM approach curve as a

function of spatial position. The stiffness is higher (range: 14 – 24 N/m) on the PGA-terminated surface (b) in comparison to the surface after protein film formation (d, range: 4 – 14 N/m). A protein layer signifies a soft surface where the stiffness is expected to be lower. Furthermore, the stiffness is quite homogenous over the entire surface (see histograms in fig. S5) confirming the formation of an intact protein layer. Scale bar is 2  $\mu\text{m}$ .

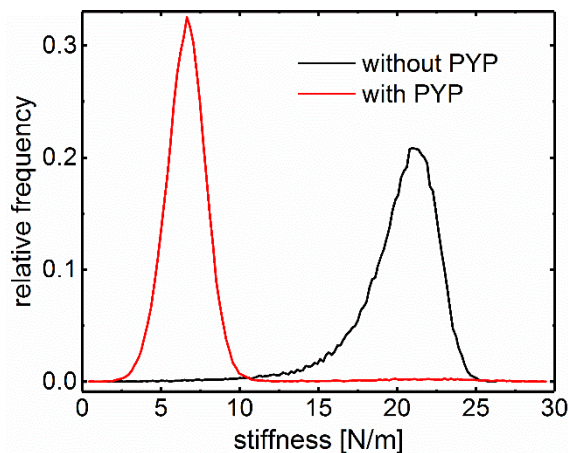

**Figure S5.** Histogram of stiffness values from the entire images (b) and (d) in figure S4. A lower stiffness for the PEI+(PGA+PLL)<sub>6.5</sub>+PYP case (red curve) is consistent with the formation of an intact protein layer.

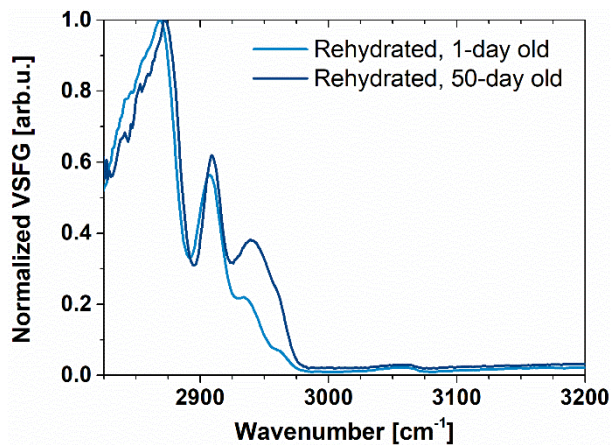

**Figure S6.** Structural stability of a PEI+(PGA+PLL)<sub>6.5</sub>+PYP film over time, i.e., 1 day and 50 days after film assembly. The film was rehydrated for at least two hours before the measurements.
